# Supplementary material for: Can you hear us now? The impact of health-care utilization by rare disease patients in the United States
Source: PubMed Central journal article supplement (PMC8553605; doi:10.1038/s41436-021-01241-7), 2021-06-28
Supplement: 41436_2021_1241_MOESM1_ESM.pdf [file 41436_2021_1241_MOESM1_ESM.pdf]

## **Supplementary Table Legend**

**Table S1:** Description and location of hospitals from National Inpatient Stay (NIS) database.

**Table S2:** NIS, KID, NRD and NEDS HCUP data elements definitions.

**Table S3:** List of the 2,118 ICD-10 codes used for data analysis. Average age, average length of stay and average total charges per visit, count and reported genetic involvement are included for each condition. This is an unweighted sample, and conditions with under 11 discharges are not included per HCUP guidelines.

**Table S4:** NIS and KID payer stratified by race.

**Supplementary Table 1. Hospital of health care utilization**

| <b>Category</b>          | <b>%</b> |
|--------------------------|----------|
| NIS                      |          |
| <b>Hospital Region</b>   |          |
| Northeast                | 13.0     |
| Midwest                  | 30.1     |
| South                    | 38.1     |
| West                     | 18.8     |
| <b>Teaching Hospital</b> |          |
| Rural                    | 37.2     |
| Urban Non-Teaching       | 31.7     |
| Urban Teaching           | 31.1     |
| <b>Hospital Bedsize</b>  |          |
| Small                    | 50.5     |
| Medium                   | 20.0     |
| Large                    | 24.5     |

**Supplementary Table 4. Payer stratified by race and ethnicity**

| <b>NIS</b>   | <b>White</b>  |               | <b>Black</b>  |               | <b>Hispanic</b> |               | <b>Asian or Pacific Islander</b> |               | <b>Native American</b> |               | <b>Other</b>  |               |
|--------------|---------------|---------------|---------------|---------------|-----------------|---------------|----------------------------------|---------------|------------------------|---------------|---------------|---------------|
| <b>Payer</b> | <b>RD (%)</b> | <b>CC (%)</b> | <b>RD (%)</b> | <b>CC (%)</b> | <b>RD (%)</b>   | <b>CC (%)</b> | <b>RD (%)</b>                    | <b>CC (%)</b> | <b>RD (%)</b>          | <b>CC (%)</b> | <b>RD (%)</b> | <b>CC (%)</b> |
| Private      | 24.2          | 35.3          | 19.0          | 23.1          | 20.7            | 25.0          | 32.8                             | 47.5          | 17.1                   | 21.3          | 28.7          | 19.2          |
| Medicare     | 60.2          | 39.9          | 45.2          | 28.2          | 35.9            | 17.9          | 41.4                             | 18.5          | 40.0                   | 23.7          | 37.7          | 35.8          |
| Medicaid     | 10.8          | 17.9          | 28.6          | 39.0          | 34.4            | 47.1          | 20.2                             | 26.0          | 35.0                   | 44.5          | 25.6          | 35.4          |
| Self-pay     | 0.0           | 0.4           | 0.0           | 0.1           | 0.1             | 0.1           | 0.0                              | 0.1           | 0.0                    | 0.0           | 0.0           | 0.1           |

  

| <b>KID</b>   | <b>White</b>  |               | <b>Black</b>  |               | <b>Hispanic</b> |               | <b>Asian or Pacific Islander</b> |               | <b>Native American</b> |               | <b>Other</b>  |               |
|--------------|---------------|---------------|---------------|---------------|-----------------|---------------|----------------------------------|---------------|------------------------|---------------|---------------|---------------|
| <b>Payer</b> | <b>RD (%)</b> | <b>CC (%)</b> | <b>RD (%)</b> | <b>CC (%)</b> | <b>RD (%)</b>   | <b>CC (%)</b> | <b>RD (%)</b>                    | <b>CC (%)</b> | <b>RD (%)</b>          | <b>CC (%)</b> | <b>RD (%)</b> | <b>CC (%)</b> |
| Private      | 54.4          | 54.8          | 22.0          | 23.2          | 22.8            | 24.5          | 57.6                             | 57.7          | 21.7                   | 21.8          | 39.7          | 40.6          |
| Medicare     | 0.5           | 0.4           | 0.8           | 0.5           | 0.3             | 0.2           | 0.4                              | 0.3           | 0.5                    | 0.2           | 0.3           | 0.3           |
| Medicaid     | 38.8          | 37.5          | 70.6          | 69.0          | 68.0            | 68.1          | 33.0                             | 33.0          | 72.2                   | 69.4          | 51.6          | 50.9          |
| Self-pay     | 0.0           | 0.5           | 0.0           | 0.0           | 0.0             | 0.0           | 0.1                              | 0.1           | 0.0                    | 0.0           | 0.0           | 0.0           |
